# Supplementary material for: Two Isoforms of the Guanine Nucleotide Exchange Factor, Daple/CCDC88C Cooperate as Tumor Suppressors
Source: PubMed Central journal article supplement (PMC6702192; doi:10.1038/s41598-019-48420-w), 2019-08-20
Supplement: 41598_2019_48420_MOESM1_ESM.pdf [file 41598_2019_48420_MOESM1_ESM.pdf]

# SUPPLEMENTARY ONLINE MATERIALS

## Two Isoforms of the Guanine Nucleotide Exchange Factor, Daple/CCDC88C Cooperate as Tumor Suppressors

Jason Ear<sup>1, 2¶</sup>, Ying Dunkel<sup>1¶</sup>, Yash Mittal<sup>1</sup>, Blaze B. C. Lim<sup>1</sup>, Lawrence Liu<sup>1</sup>, Magda K. Holda<sup>1</sup>, Ulrich Nitsche<sup>3</sup>, Jorge Barbazán<sup>4</sup>, Ajay Goel<sup>5</sup>, Klaus-Peter Janssen<sup>3</sup>, Nicolas Aznar<sup>1, 6¶§</sup>, and Pradipta Ghosh<sup>1, 2, 7§</sup>

<sup>1</sup>Department of Medicine, University of California, San Diego, La Jolla, California, USA.

<sup>2</sup>Department of Cellular and Molecular Medicine, University of California, San Diego, La Jolla, California, USA.

<sup>3</sup>Department of Surgery, Klinikumrechts der Isar, Technische Universität München, Munich, Germany.

<sup>4</sup>Translational Medical Oncology Laboratory, Health Research Institute of Santiago (IDIS), SERGAS. Santiago de Compostela, Spain.

<sup>5</sup>Division of Gastroenterology, Department of Internal Medicine and Charles A. Sammons Cancer Center and Baylor Research Institute, Baylor University Medical Center, Dallas, Texas, USA.

<sup>6</sup>Department of Cancer Cell Plasticity, Team Development Cancer and Stem Cells, Cancer Research Center of Lyon, Centre Léon Bérard, Lyon, France.

<sup>7</sup>Moore's Cancer Center, University of California, San Diego, La Jolla, California, USA.

**Running Title:** Two Daple isoforms cooperatively suppress tumorigenesis

**Key Words:** G protein, Wnt, Frizzled, ccdc88c/DAPLE,  $\beta$ Catenin, Disheveled, PI3-Kinase, Akt, Rac1, Colon cancer.

¶ These authors contributed equally to this work.

§ **To whom correspondence should be addressed:** §Corresponding author. Email: [Nicolas.AZNAR@lyon.unicancer.fr](mailto:Nicolas.AZNAR@lyon.unicancer.fr) (N.A.), [prghosh@ucsd.edu](mailto:prghosh@ucsd.edu) (P.G.).

**A**

| Name        | Protein Length | Ensembl (Transcript ID)     | UniProt (Identifier) | RefSeq       |
|-------------|----------------|-----------------------------|----------------------|--------------|
| Full Length | 2028 aa        | ENST00000389857.10 (GRCh38) | Q9P219-1             | NM_001080414 |
| V2          | 552 aa         | ENST00000331194.7 (GRCh37)  | Q9P219-2             |              |
| V3          | 506 aa         | ENST00000331194.8 (GRCh38)  | AOA0A0MR69           |              |
| V4          | 478 aa         | -                           | Q9P219-3             |              |
| V5          | 96 aa          | ENST00000553403.1 (GRCh38)  | G3V3S0               |              |
| V6          | 88 aa          | ENST00000389856.9 (GRCh38)  | QOP665               |              |
| V7          | 243 aa         | -                           | B4DZB8               |              |

**B**

```

Full_Length DPASPAASQPLRSQAENPDTPALGNSCAEERDAHNGSVGKPGDLKPKRGSPhRGSldRt 1500
V2 -----MSVLSVPGDLKPKRGSPhRGSldRt 24
V3 -----MSVLSVPGDLKPKRGSPhRGSldRt 24
V4 -----
Unique V2 and V3 N-terminus

Full_Length DASTDLAMRSWPSSELGSRtCtSAtTTAPSNStPIARHPGRtKGYNSDDNLCePSLEFEV 1560
V2 DASTDLAMRSWPSSELGSRtCtSAtTTAPSNStPIARHPGRtKGYNSDDNLCePSLEFEV 84
V3 DASTDLAMRSWPSSELGSRtCtSAtTTAPSNStPIARHPGRtKGYNSDDNLCePSLEFEV 84
V4 -----MPSS-----TLPGWV 10
* : Unique V4 N-terminus : *

Full_Length PNHRQVYVRPSSLESSRNTSSNSsPLNLKGSSEQLHGRSEsFSSEDLIPSRDLAtLPREa 1620
V2 PNHRQVYVRPSSLESSRNTSSNSsPLNLKGSSEQLHGRSEsFSSEDLIPSRDLAtLPREa 144
V3 PNHRQVYVRPSSLESSRNTSSNSsPLNLKGSSEQLHGRSEsFSSEDLIPSRDLAtLPREa 144
V4 GSSGGHVSrPSSLESSRNTSSNSsPLNLKGSSEQLHGRSEsFSSEDLIPSRDLAtLPREa 70
*****

Full_Length STPGRNALGRHEyPLrNGPLPQEGaQKRGTAPPYVGVrPCSA,SPSSEMVTLEEFLEESN 1680
V2 STPGRNALGRHEyPLrNGPLPQEGaQKRGTAPPYVGVrPCSA,SPSSEMVTLEEFLEESN 204
V3 STPGRNALGRHEyPLrNGPLPQEGaQKRGTAPPYVGVrPCSA,SPSSEMVTLEEFLEESN 204
V4 STPGRNALGRHEyPLrNGPLPQEGaQKRGTAPPYVGVrPCSA,SPSSEMVTLEEFLEESN 130
*****
GBA Motif

Full_Length RSSPThDTpSCRDDILSDYFRKASDPPaIGGQPGPPAKKEGAKMPTNFVAPtVKMAAPtS 1740
V2 RSSPThDTpSCRDDILSDYFRKASDPPaIGGQPGPPAKKEGAKMPTNFVAPtVKMAAPtS 264
V3 RSSPThDTpSCRDDILSDYFRKASDPPaIGGQPGPPAKKEGAKMPTNFVAPtVKMAAPtS 264
V4 RSSPThDTpSCRDDILSDYFRKASDPPaIGGQPGPPAKKEGAKMPTNFVAPtVKMAAPtS 190
*****

Full_Length EGRPLKPGQYVKNFRLTEAEAPPsVAPRQaQPPQSLSLGRPRQAPVPPASHAPASRSAS 1800
V2 EGRPLKPGQYVKNFRLTEAEAPPsVAPRQaQPPQSLSLGRPRQAPVPPASHAPASRSAS 324
V3 EGRPLKPGQYVKNFRLTEAEAPPsVAPRQaQPPQSLSLGRPRQa----- 309
V4 EGRPLKPGQYVKNFRLTEAEAPPsVAPRQaQPPQSLSLGRPRQAPVPPASHAPASRSAS 250
*****

Full_Length LSRaFSLASADLLRASGPeACKQESpQKLGAPEALGGREtGSHTLQSPAPPSHSLARER 1860
V2 LSRaFSLASADLLRASGPeACKQESpQKLGAPEALGGREtGSHTLQSPAPPSHSLARER 384
V3 -----PEALGGREtGSHTLQSPAPPSHSLARER 338
V4 LSRaFSLASADLLRASGPeACKQESpQKLGAPEALGGREtGSHTLQSPAPPSHSLARER 310
*****

Full_Length TPLVgKAGSSCQGPGRSRPLDTRRFSLAPpKEERLAPLHQsATAPAIAtAGAGAAAAGS 1920
V2 TPLVgKAGSSCQGPGRSRPLDTRRFSLAPpKEERLAPLHQsATAPAIAtAGAGAAAAGS 444
V3 TPLVgKAGSSCQGPGRSRPLDTRRFSLAPpKEERLAPLHQsATAPAIAtAGAGAAAAGS 398
V4 TPLVgKAGSSCQGPGRSRPLDTRRFSLAPpKEERLAPLHQsATAPAIAtAGAGAAAAGS 370
*****

Full_Length GSNSQLLHFSPAAAPaARTKPKAPPRsGEVAtITPVRAGLSLSEGDGVPGQGCeGLPAK 1980
V2 GSNSQLLHFSPAAAPaARTKPKAPPRsGEVAtITPVRAGLSLSEGDGVPGQGCeGLPAK 504
V3 GSNSQLLHFSPAAAPaARTKPKAPPRsGEVAtITPVRAGLSLSEGDGVPGQGCeGLPAK 458
V4 GSNSQLLHFSPAAAPaARTKPKAPPRsGEVAtITPVRAGLSLSEGDGVPGQGCeGLPAK 430
*****

Full_Length SPGRSPDLAPHLGRALEDcSRGSVSKSSPASPEPGGDpQTVWYfYGCV 2028
V2 SPGRSPDLAPHLGRALEDcSRGSVSKSSPASPEPGGDpQTVWYfYGCV 552
V3 SPGRSPDLAPHLGRALEDcSRGSVSKSSPASPEPGGDpQTVWYfYGCV 506
V4 SPGRSPDLAPHLGRALEDcSRGSVSKSSPASPEPGGDpQTVWYfYGCV 478
*****
PDZ-binding motif

```

**Supplementary Figure 1: (A)** Table shows the identifiers (Ensembl, UniProt, and RefSeq) of the transcripts and protein length encoded by the Daple/CCDC88C gene. Daple-V2 was annotated in Ensembl assembly GRCh37 and Daple-V3 was annotated on GRCh38. **(B)** Sequence alignment of the various isoforms containing the modular C-terminal domain and its various motif are displayed. Red Box = Unique residues at the N-terminal end of Daple-V2 and Daple-V3. Blue Box = Unique residues at the N-terminal end of Daple-V4. Brown = GBA motif identified previously<sup>1</sup>. Green Box = PDZ-binding motif (PBM) that was reported earlier<sup>2</sup>.

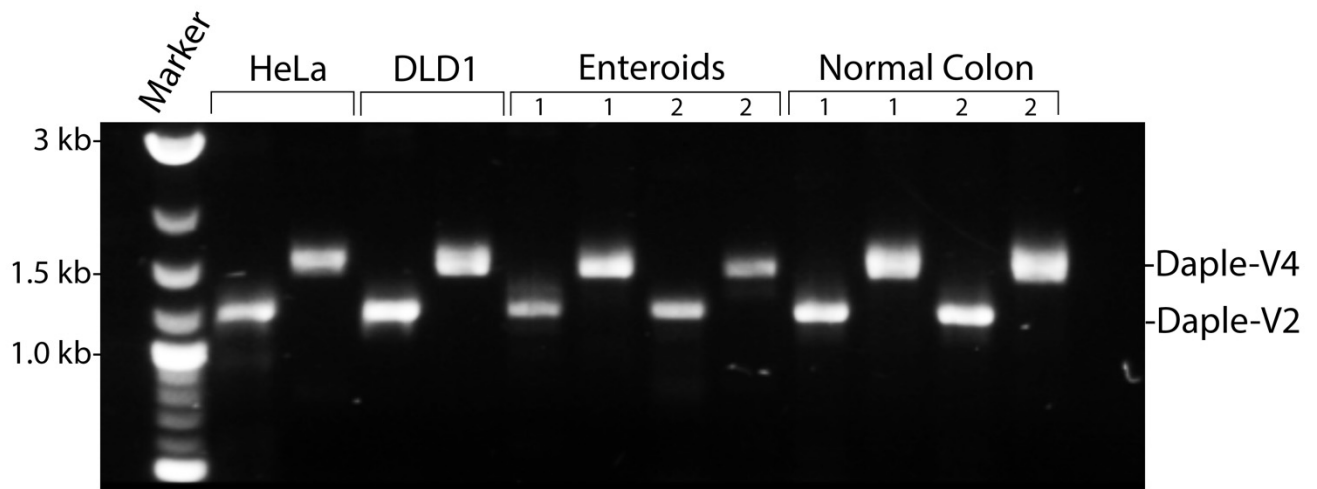

**Supplementary Figure 2:** Semi-quantitative RT-PCR for Daple-V4 and Daple-V2 transcripts from HeLa and DLD1 cell lines, human gut enteroids, and normal human colon. Two independent samples of gut enteroids and two independent sample of normal colon were analyzed for transcript expression.

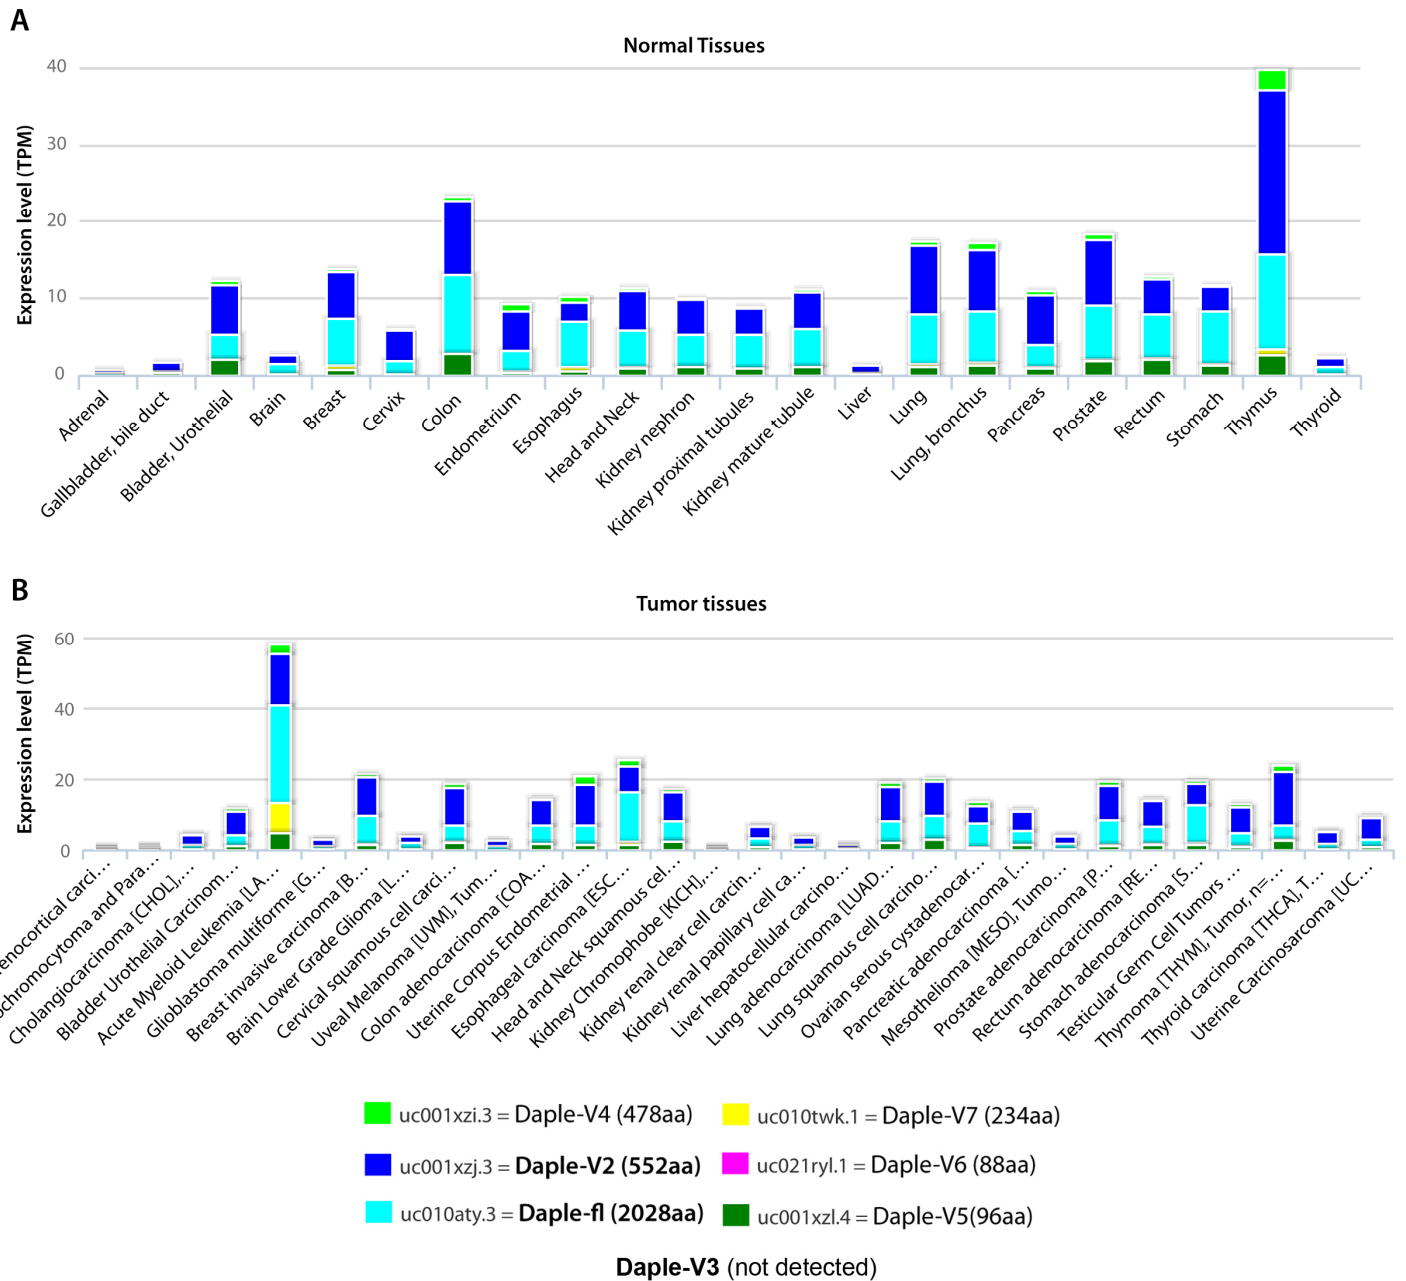

**Supplementary Figure 3. Daple-V2 is the predominant isoform expressed across all normal (A) as well as tumor (B) tissues, at levels often similar to that of the RefSeq full length form, Daple-fl.** The expression level of various Daple (CCDC88C) isoforms in normal and cancer tissues was analyzed by ISOexpresso, a web-based platform (see *Methods*; <http://wiki.tgilab.org/ISOexpresso/>). This analysis is performed using the RNA-seq datasets obtained from The Cancer Genome Atlas (TCGA) Data Portal. TPM, Median transcripts per million was used to determine the expression level of isoforms and was calculated by multiplying the median value of the estimates of the transcript in each sample group by one million.

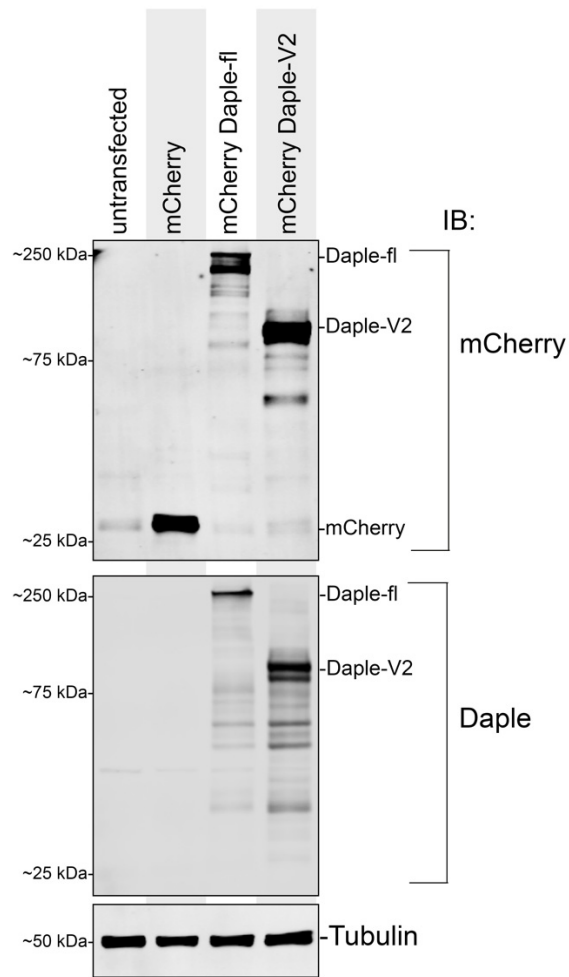

**Supplementary Figure 4:** Whole cell lysates of HeLa cells transfected with mCherry tagged Daple-fl, Daple-V2, or mCherry tag control. Expression was validated by immunoblotting using antibodies for mCherry or Daple. Tubulin was used for loading control.

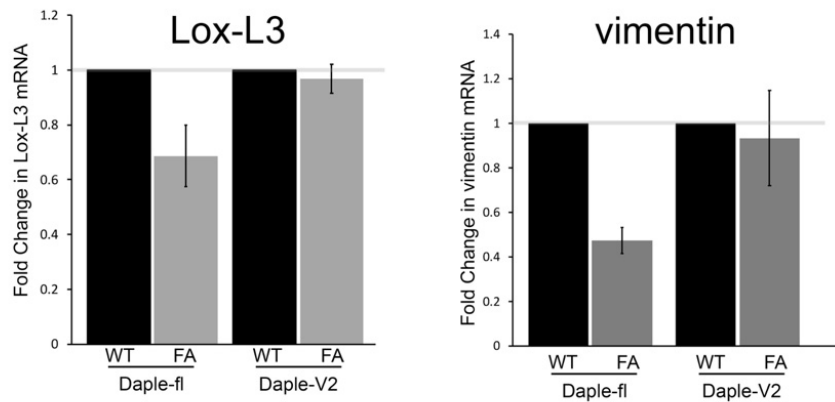

**Supplementary Figure 5.** mRNA expression of the EMT markers LOX-L3 (*left*) and Vimentin (*right*) were analyzed by qPCR. Results were normalized internally to mRNA levels of the housekeeping gene, GAPDH. Bar graphs display the fold change in each RNA (Y axis) normalized to the expression in cells expressing Daple-fl-WT or Daple-V2-WT. Error bars represent mean  $\pm$  S.D of 3 independent experiments. The GBA motif of Daple-fl, but not Daple-V2 enhances the expression of genes that trigger EMT. *p* values when comparing WT vs FA: 0.046 (Lox-L3) and 0.021 (Vimentin) for Daple-fl; n.s. for both Lox-L3 and Vimentin in the case of Daple-V2.

A

| Cell line | MSI status | CIMP panel 1 | CIMP panel 2 | CIN | KRAS | BRAF  | PIK3CA      | PTEN | TP53        | Growth suppressive-effect of Aspirin (citation) |
|-----------|------------|--------------|--------------|-----|------|-------|-------------|------|-------------|-------------------------------------------------|
| DLD-1     | MSI        | +            | +            | -   | G13D | wt    | E545K;D549N | wt   | S241F       | +++ (this work)                                 |
| HCT-116   | MSI        | +            | +            | -   | G13D | wt    | H1047R      | wt   | wt          | +++ *                                           |
| HCT-15    | MSI        | +            | +            | -   | G13D | wt    | E545K;D549N | wt   | S241F       | +++ *                                           |
| RKO       | MSI        | +            | +            | -   | wt   | V600E | H1047R      | wt   | wt          | +++ *                                           |
| SW48      | MSI        | +            | +            | -   | wt   | wt    | wt          | wt   | wt          | -/+ *                                           |
| Caco-2    | MSS        | +            | -            | +   | wt   | wt    | wt          | wt   | E204X       | -/+ *                                           |
| HT-29     | MSS        | +            | +            | +   | wt   | V600E | P449T       | wt   | R273H       | +++ *                                           |
| SW480     | MSS        | -            | -            | +   | G12V | wt    | wt          | wt   | R273H;P309S | -/+ *                                           |

B

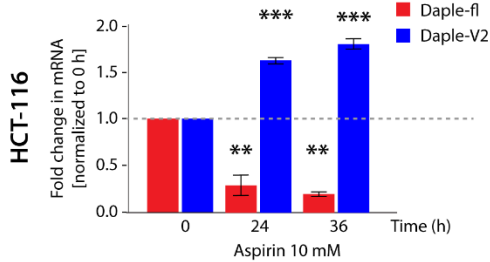

C

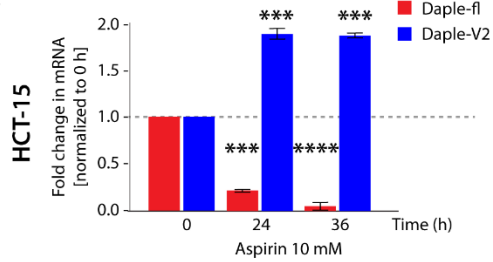

D

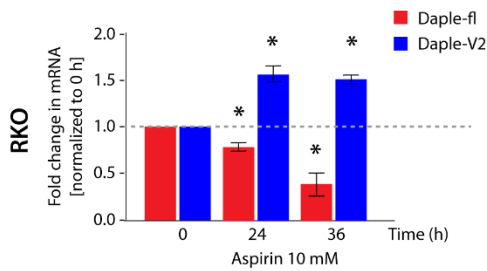

E

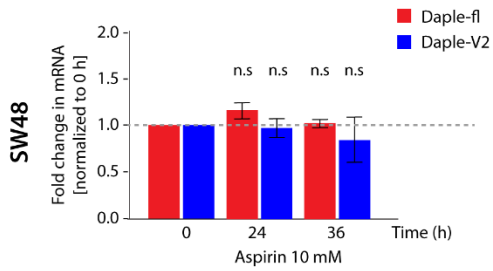

F

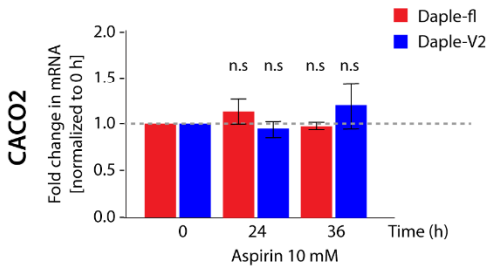

G

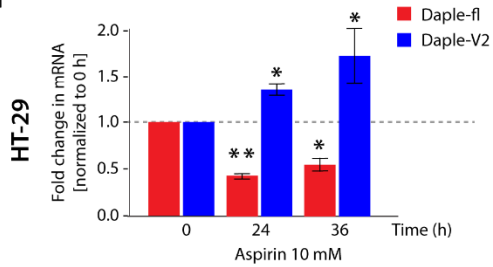

H

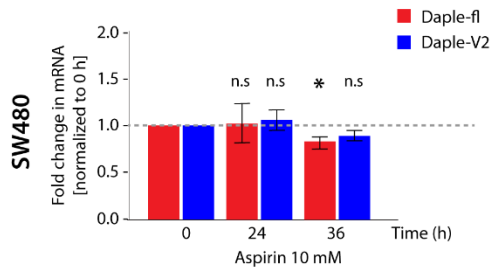

**Supplementary Figure 6: Aspirin increases the ratio of Daple-V2: Daple-fl transcripts in CRC cell lines that harbor PIK3CA mutation. (A)** Table listing the CRC cell lines used in studying the impact of Aspirin on the expression of Daple isoforms. *Abbreviations:* CIN, chromosomal instability pathway; MSI, microsatellite instability; MSS, microsatellite stable; CIMP, CpG island methylator phenotype; X, stop codon; fs, frame shift; wt, wild type. Mutations are annotated at the protein level as described by den Dunnen *et al.*<sup>3</sup> and Ahmed *et al.*<sup>4</sup> (standard one-letter amino acid abbreviations). \* = Aspirin-sensitivity as documented earlier<sup>5</sup>. **(B-H)** cells were analyzed for Daple-fl and Daple-V2 mRNA by qPCR at indicated time points after exposure to 10 mM Aspirin. Bar graphs display the fold change in each mRNA (Y axis) normalized to the expression levels at 0 hour. Error bars represent mean  $\pm$  S.D of 3 independent experiments. *p* values: \* = <0.05; \*\* < 0.01; \*\*\* < 0.001; \*\*\*\* <0.0001.

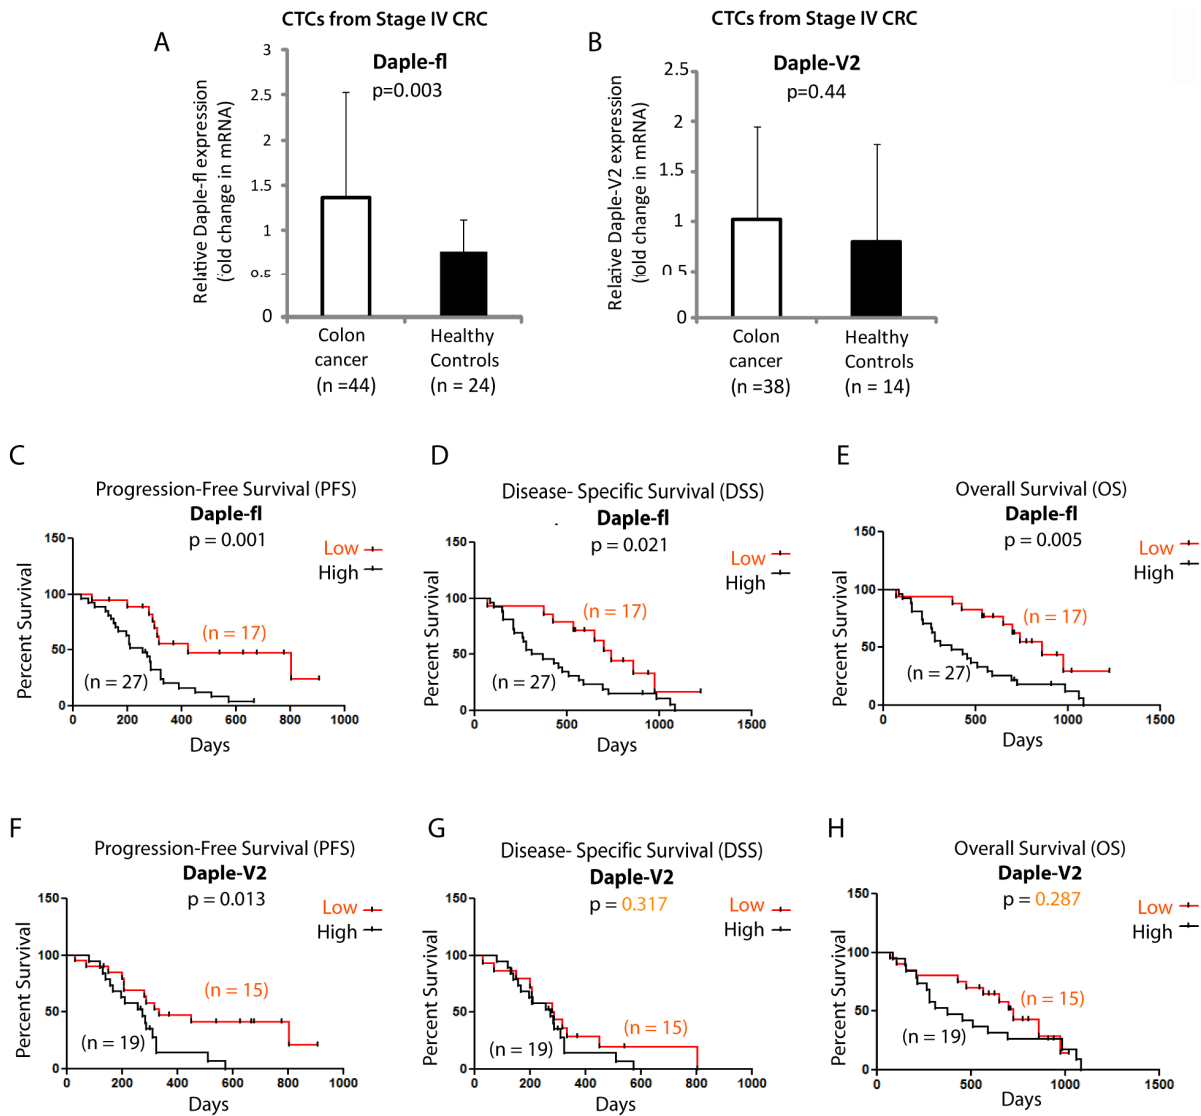

**Supplementary Figure 7: Daple-fl, but not Daple-V2 is elevated in circulating tumor cells (CTCs) and its high expression carries a worse prognosis.** (A-B) EpCAM (epithelial cell adhesion molecule)-immunisolated CTC fractions from the peripheral blood of patients with metastatic colorectal cancer (stage IV CRC) or from healthy subjects were analyzed for Daple-fl (A) or Daple-V2 (B) mRNA by qPCR and adjusted for leukocyte contaminants by normalizing to CD45. Bar graph displays the level of Daple expression in each cohort. A normality test confirmed that datasets in both groups were distributed normally. No significant differences were observed in the CD45 levels between two groups (*not shown*). Compared to normal subjects, levels of Daple-fl (A), but not Daple-V2 (B) mRNA is frequently elevated in CTCs from patients with metastatic colorectal cancer. (C-H) Optimal cut-off values for Daple-fl and -V2 mRNA expression were statistically derived (see detailed "Materials and Methods") to generate subgroups of patients with high or low expression levels. Time-dependent progression-free (PFS) and overall (OS) survival probabilities were estimated with the Kaplan-Meier method, and the log-rank test was used to compare the subgroups. Expression of Daple-fl mRNA at high levels in CTCs was associated with poorer progression-free (PFS; C), disease specific (DSS; D) and overall (OS; E) survival in patients with metastatic colorectal carcinoma. Expression of Daple-V2 at high levels in CTCs was associated with poorer PFS (F), but had no effect on DSS (G) or OS (H).



## SUPPLEMENTARY REFERENCES

- 1 Aznar, N. *et al.* Daple is a novel non-receptor GEF required for trimeric G protein activation in Wnt signaling. *Elife* **4**, e07091, doi:10.7554/eLife.07091 (2015).
- 2 Oshita, A. *et al.* Identification and characterization of a novel Dvl-binding protein that suppresses Wnt signalling pathway. *Genes to cells : devoted to molecular & cellular mechanisms* **8**, 1005-1017 (2003).
- 3 den Dunnen, J. T. & Antonarakis, S. E. Mutation nomenclature extensions and suggestions to describe complex mutations: a discussion. *Hum Mutat* **15**, 7-12, doi:10.1002/(SICI)1098-1004(200001)15:1<7::AID-HUMU4>3.0.CO;2-N (2000).
- 4 Ahmed, D. *et al.* Epigenetic and genetic features of 24 colon cancer cell lines. *Oncogenesis* **2**, e71, doi:10.1038/oncsis.2013.35 (2013).
- 5 Zumwalt, T. J. *et al.* Aspirin-Induced Chemoprevention and Response Kinetics Are Enhanced by PIK3CA Mutations in Colorectal Cancer Cells. *Cancer Prev Res (Phila)* **10**, 208-218, doi:10.1158/1940-6207.CAPR-16-0175 (2017).
